# Supplementary material for: Lattice Expansion in Rb-Doped Hybrid Organic–Inorganic Perovskite Crystals Resulting in Smaller Band-Gap and Higher Light-Yield Scintillators
Source: PubMed Central journal article supplement (PMC10265701; doi:10.1021/acs.inorgchem.3c00270), 2023-05-26
Supplement: ic3c00270_si_001.pdf [file ic3c00270_si_001.pdf]

# Supplementary Information for Lattice Expansion in Rb Doped Hybrid Organic-Inorganic Perovskite Crystals Resulting Smaller-Bandgap and Higher-Light-Yield Scintillators

Francesco Maddalena,<sup>\*,†,‡</sup> Muhammad Haris Mahyuddin,<sup>¶</sup> Dominik Kowal,<sup>§</sup>  
Marcin E. Witkowski,<sup>||</sup> Michal Makowski,<sup>||</sup> Md Abdul Kuddus Sheikh,<sup>§</sup> Somnath  
Mahato,<sup>§</sup> Roman Jędrzejewski,<sup>§</sup> Winicjusz Drozdowski,<sup>||</sup> Christophe Dujardin,<sup>⊥</sup>  
Cuong Dang,<sup>†,‡</sup> and Muhammad Danang Birowosuto<sup>\*,§</sup>

<sup>†</sup>*School of Electrical and Electronic Engineering, Nanyang Technological University, Singapore  
639798, Singapore*

<sup>‡</sup>*CINTRA UMI CNRS/NTU/THALES 3288, Research Techno Plaza, 50 Nanyang Drive, Border X  
Block, Level 6, Singapore 637553, Singapore*

<sup>¶</sup>*Research Group of Advanced Functional Materials, Faculty of Industrial Technology, Institut  
Teknologi Bandung, Bandung 40132, Indonesia.*

<sup>§</sup>*Lukasiewicz Research Network-PORT Polish Center for Technology Development, Stabłowska 147,  
54-066 Wrocław, Poland*

<sup>||</sup>*Institute of Physics, Faculty of Physics, Astronomy, and Informatics, Nicolaus Copernicus University  
in Torun, ul. Grudziadzka 5, 87-100 Torun, Poland*

<sup>⊥</sup>*Université de Lyon, Université Claude Bernard, Lyon 1, CNRS, Institut Lumière Matière UMR5306,  
Villeurbanne F-69622, France.*

E-mail: francesco\_maddalena@ntu.edu.sg; muhammad.birowosuto@port.lukasiewicz.gov.pl

# List of Figures

|   |                                                                                                                                                                                                                                                                                                                                                                                                                                                   |    |
|---|---------------------------------------------------------------------------------------------------------------------------------------------------------------------------------------------------------------------------------------------------------------------------------------------------------------------------------------------------------------------------------------------------------------------------------------------------|----|
| 1 | Rietveld refinements of single-crystal X-ray diffraction (XRD) spectra (right) and crystal structure (left) from a) undoped $\text{BA}_2\text{PbBr}_4$ , b) Rb-doped $\text{BA}_2\text{PbBr}_4$ , c) undoped $\text{PEA}_2\text{PbBr}_4$ , and d) Rb-doped $\text{PEA}_2\text{PbBr}_4$ using reference structures from. <sup>1</sup> The lattice parameters are shown in Supplementary Table S1. . . . .                                          | 5  |
| 2 | Rb $\text{Pb}_2\text{Br}_5$ crystals as comparisons. a) Images of crystals, b) Reitveld refinements of XRD spectrum using reference from, <sup>2</sup> The lattice parameters are shown in Supplementary Table S1. c) Photoluminescence (PL) and absorption spectra, d) Temperature-dependent Radioluminescence (RL) and light yield as function of temperature (inset). . . . .                                                                  | 6  |
| 3 | X-ray photo-electron spectroscopy data for the Rb-doped 2D-perovskites: Pb-peaks for a) Rb- $\text{BA}_2\text{PbBr}_4$ and b) Rb- $\text{PEA}_2\text{PbBr}_4$ ; C-peaks for c) Rb- $\text{BA}_2\text{PbBr}_4$ and d) Rb- $\text{PEA}_2\text{PbBr}_4$ ; N-peaks for e) Rb- $\text{BA}_2\text{PbBr}_4$ and f) Rb- $\text{PEA}_2\text{PbBr}_4$ , and Br-peaks for g) Rb- $\text{BA}_2\text{PbBr}_4$ and h) Rb- $\text{PEA}_2\text{PbBr}_4$ . . . . . | 8  |
| 4 | Raman spectra and their vibrational modes similar as reported in <sup>3</sup> for undoped, Li doped, and Rb doped, a) $\text{BA}_2\text{PbBr}_4$ and b) $\text{PEA}_2\text{PbBr}_4$ . The weak influence of doping to the Raman spectra for $\text{PEA}_2\text{PbBr}_4$ can be related with the structure itself or unexpected small concentration. . . . .                                                                                       | 9  |
| 5 | Absorption spectra from a) undoped and b) Rb-doped $\text{BA}_2\text{PbBr}_4$ and c) undoped and d) Rb-doped $\text{PEA}_2\text{PbBr}_4$ and their fitting curves with Elliot method in Supplementary Eqs. S1 and S2. <sup>4</sup> . . . . .                                                                                                                                                                                                      | 10 |
| 6 | PL (solid lines) and RL (dotted lines) spectra for a) undoped (black) and Rb doped (red) $\text{BA}_2\text{PbBr}_4$ and c) undoped (black) and d) Rb-doped (red) $\text{PEA}_2\text{PbBr}_4$ . . . . .                                                                                                                                                                                                                                            | 11 |
| 7 | The fit of glow curves of undoped and Rb-doped $\text{BA}_2\text{PbBr}_4$ and $\text{PEA}_2\text{PbBr}_4$ with multiple Randal-Wilkins method in Supplementary Eq. SS4. <sup>5,6</sup> The parameters of the fit are shown in Supplementary Table S5. . . . .                                                                                                                                                                                     | 12 |

|    |                                                                                                                                                                                                                                                                                                                                              |    |
|----|----------------------------------------------------------------------------------------------------------------------------------------------------------------------------------------------------------------------------------------------------------------------------------------------------------------------------------------------|----|
| 8  | RbPb <sub>2</sub> Br <sub>5</sub> crystals as comparisons. a) Afterglow curve and b) TL peaks with the parameters are on the inset table. . . . .                                                                                                                                                                                            | 13 |
| 9  | $\gamma$ -ray excited scintillation decay curves at 661.7 keV ( <sup>137</sup> Cs) and room temperature for a) undoped and b) Rb-doped BA <sub>2</sub> PbBr <sub>4</sub> and c) undoped and d) Rb-doped PEA <sub>2</sub> PbBr <sub>4</sub> and their fitting curves with three exponential decay model. . . . .                              | 14 |
| 10 | Pulse height spectra with a 661.7 keV gamma-ray sources for undoped and Rb-doped BA <sub>2</sub> PbBr <sub>4</sub> and PEA <sub>2</sub> PbBr <sub>4</sub> . The arrows indicate the position of the photopeaks and the positions of the undoped peaks were normalized to each other for showing the differences with the doped ones. . . . . | 15 |

## List of Tables

|   |                                                                                                                                                                                                                                   |    |
|---|-----------------------------------------------------------------------------------------------------------------------------------------------------------------------------------------------------------------------------------|----|
| 1 | Crystal data and structure refinement from XRD spectra of undoped and Rb-doped BA <sub>2</sub> PbBr <sub>4</sub> and PEA <sub>2</sub> PbBr <sub>4</sub> measured at ambient pressure. . . . .                                     | 7  |
| 2 | Parameters of the PL decay curves, where $\tau_i$ is the decay time, $C_i$ is the contribution of the decay time and $\bar{\tau}$ is the mean time of the decay. . . . .                                                          | 9  |
| 3 | Parameters for the negative thermal quenching fitting. . . . .                                                                                                                                                                    | 10 |
| 4 | Parameters of the afterglow curves, where $\tau_i$ is the decay time, $C_i$ is the contribution of the decay time and $\bar{\tau}$ is the mean time of the decay. . . . .                                                         | 11 |
| 5 | Parameters of the thermoluminescence (TL) peak fitting, where $T_{max}$ is temperature where the maximum of the peak occurs, $E$ is the trap depth, $n_0$ is the trap concentration and $\sigma$ is the frequency factor. . . . . | 13 |
| 6 | Parameters of the scintillation decay curves, where $\tau_i$ is the decay time, $C_i$ is the contribution of the decay time and $\bar{\tau}$ is the mean time of the decay. . . . .                                               | 14 |

# Rietveld Refinements

The Rietveld program Fullprof<sup>7</sup> was selected to analyse the data in this study. The profile function of a Thompson-Cox-Hastings pseudo-Voigt function was used. The background function was the sixth order of polynomials. The results are shown in Supplementary Figures 1 and 2 while the parameters are shown in Supplementary Table 1.

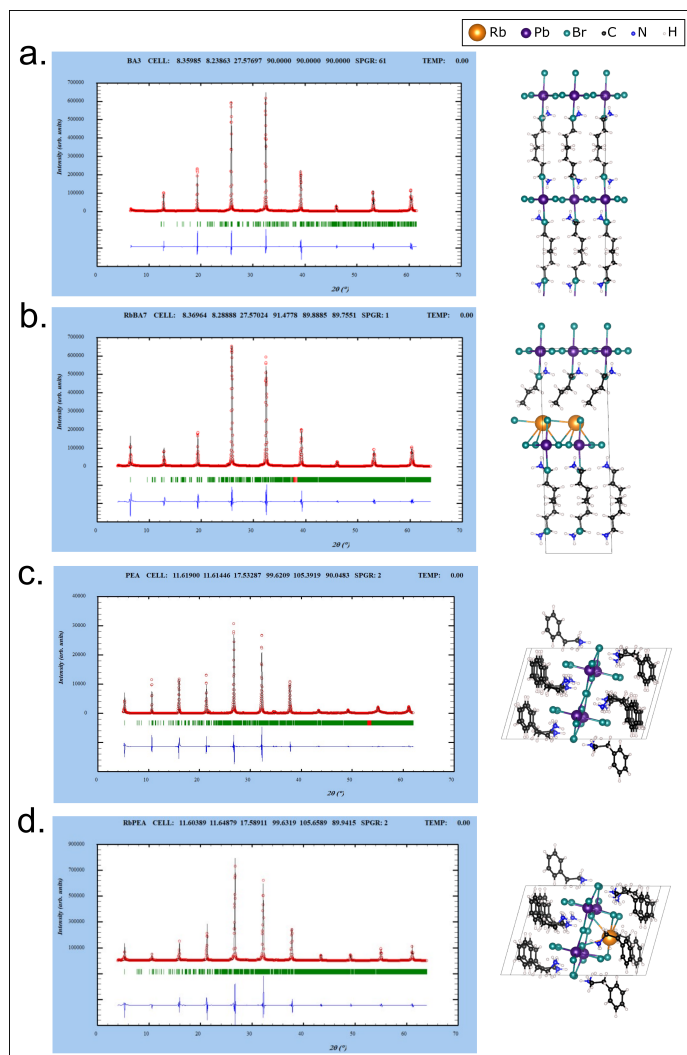

**Supplementary Figure S1:** Rietveld refinements of single-crystal X-ray diffraction (XRD) spectra (right) and crystal structure (left) from a) undoped  $\text{BA}_2\text{PbBr}_4$ , b) Rb-doped  $\text{BA}_2\text{PbBr}_4$ , c) undoped  $\text{PEA}_2\text{PbBr}_4$ , and d) Rb-doped  $\text{PEA}_2\text{PbBr}_4$  using reference structures from.<sup>1</sup> The lattice parameters are shown in Supplementary Table S1.



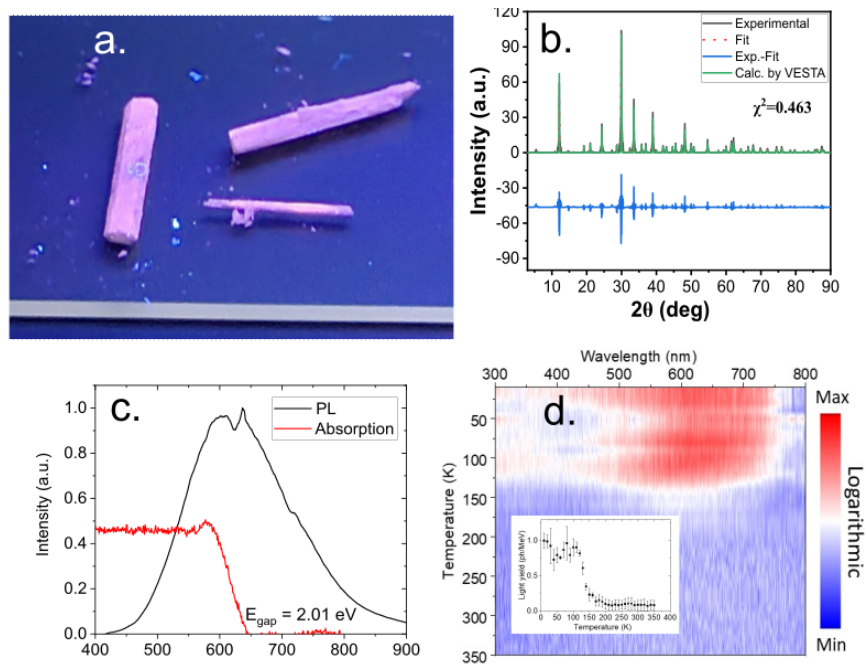

**Supplementary Figure S 2:** RbPb<sub>2</sub>Br<sub>5</sub> crystals as comparisons. a) Images of crystals, b) Reitveld refinements of XRD spectrum using reference from,<sup>2</sup> The lattice parameters are shown in Supplementary Table S1. c) Photoluminescence (PL) and absorption spectra, d) Temperature-dependent Radioluminescence (RL) and light yield as function of temperature (inset).

**Supplementary Table S 1:** Crystal data and structure refinement from XRD spectra of undoped and Rb-doped  $\text{BA}_2\text{PbBr}_4$  and  $\text{PEA}_2\text{PbBr}_4$  measured at ambient pressure.

| Lattice parameters   | $\text{BA}_2\text{PbBr}_4$                                                                                                                | Rb- $\text{BA}_2\text{PbBr}_4$                                                                                                            | $\text{PEA}_2\text{PbBr}_4$                                                                                                                  | Rb- $\text{PEA}_2\text{PbBr}_4$                                                                                                              | $\text{RbPb}_2\text{Br}_5$                                                                                                                |
|----------------------|-------------------------------------------------------------------------------------------------------------------------------------------|-------------------------------------------------------------------------------------------------------------------------------------------|----------------------------------------------------------------------------------------------------------------------------------------------|----------------------------------------------------------------------------------------------------------------------------------------------|-------------------------------------------------------------------------------------------------------------------------------------------|
| Source               | Laboratory X-ray (Cu $K\alpha$ )                                                                                                          |                                                                                                                                           |                                                                                                                                              |                                                                                                                                              |                                                                                                                                           |
| Wavelength           | 1.540(6) Å                                                                                                                                |                                                                                                                                           |                                                                                                                                              |                                                                                                                                              |                                                                                                                                           |
| Chemical Formula     | $\text{C}_8\text{H}_{24}\text{Br}_4\text{N}_2\text{Pb}$                                                                                   | $\text{C}_{24}\text{H}_{72}\text{Br}_{16}\text{N}_6\text{Pb}_4\text{Rb}_2$                                                                | $\text{C}_{16}\text{H}_{24}\text{Br}_4\text{N}_2\text{Pb}$                                                                                   | $\text{C}_{56}\text{H}_{84}\text{Br}_{16}\text{N}_7\text{Pb}_4\text{Rb}$                                                                     | $\text{RbPb}_2\text{Br}_5$                                                                                                                |
| Formula weight       | 675.12 g/mol                                                                                                                              | 679.39 g/mol                                                                                                                              | 771.20 g/mol                                                                                                                                 | 775.47 g/mol                                                                                                                                 | 899.39 g/mol                                                                                                                              |
| Temperature          | 298(2) K                                                                                                                                  | 298(2) K                                                                                                                                  | 298(2) K                                                                                                                                     | 298(2) K                                                                                                                                     | 298(2) K                                                                                                                                  |
| Crystal system       | Orthorhombic                                                                                                                              | Triclinic                                                                                                                                 | Triclinic                                                                                                                                    | Triclinic                                                                                                                                    | Body-centered cubic                                                                                                                       |
| Space group (No.)    | $Pbca$ (61)                                                                                                                               | $P1$ (1)                                                                                                                                  | $P-1$ (2)                                                                                                                                    | $P-1$ (2)                                                                                                                                    | $I4/mcm$ (140)                                                                                                                            |
| Unit cell dimensions | a = 8.359(9) Å<br>b = 8.238(6) Å<br>c = 27.577(0) Å<br>$\alpha = 90.00(0)^\circ$<br>$\beta = 90.00(0)^\circ$<br>$\gamma = 90.00(0)^\circ$ | a = 8.369(6) Å<br>b = 8.288(9) Å<br>c = 27.570(2) Å<br>$\alpha = 91.47(8)^\circ$<br>$\beta = 89.88(8)^\circ$<br>$\gamma = 89.75(5)^\circ$ | a = 11.619(0) Å<br>b = 11.614(5) Å<br>c = 17.532(9) Å<br>$\alpha = 99.62(1)^\circ$<br>$\beta = 105.39(2)^\circ$<br>$\gamma = 90.04(8)^\circ$ | a = 11.603(9) Å<br>b = 11.648(8) Å<br>c = 17.589(1) Å<br>$\alpha = 99.63(2)^\circ$<br>$\beta = 105.65(9)^\circ$<br>$\gamma = 89.94(2)^\circ$ | a = 8.450(2) Å<br>b = 8.450(2) Å<br>c = 14.597(7) Å<br>$\alpha = 90.00(0)^\circ$<br>$\beta = 90.00(0)^\circ$<br>$\gamma = 90.00(0)^\circ$ |
| Volume               | 1899.328(3) Å <sup>3</sup>                                                                                                                | 1912.026(3) Å <sup>3</sup>                                                                                                                | 2246.541(6) Å <sup>3</sup>                                                                                                                   | 2254.588(3) Å <sup>3</sup>                                                                                                                   | 1042.351(3) Å <sup>3</sup>                                                                                                                |
| Z                    | 4                                                                                                                                         | 4                                                                                                                                         | 4                                                                                                                                            | 4                                                                                                                                            | 4                                                                                                                                         |
| $d_{hkl}$            | $d_{002} = 13.788(5)$ Å                                                                                                                   | $d_{002} = 13.783(0)$ Å                                                                                                                   | $d_{001} = 16.648(1)$ Å                                                                                                                      | $d_{001} = 16.681(9)$ Å                                                                                                                      | $d_{002} = 7.298(5)$ Å                                                                                                                    |
| $\chi^2$             | 2.9                                                                                                                                       | 4.8                                                                                                                                       | 3.7                                                                                                                                          | 4.2                                                                                                                                          | 1.3                                                                                                                                       |
| $R_p$                | 16.2                                                                                                                                      | 18.5                                                                                                                                      | 24.3                                                                                                                                         | 26.9                                                                                                                                         | 34.9                                                                                                                                      |
| $R_{wp}$             | 23.0                                                                                                                                      | 27.2                                                                                                                                      | 35.0                                                                                                                                         | 38.4                                                                                                                                         | 42.3                                                                                                                                      |
| CCDC No.             | 2257540                                                                                                                                   | 2257555                                                                                                                                   | 2257548                                                                                                                                      | 2238869                                                                                                                                      | 2239005                                                                                                                                   |
| Calculated density   | 2.361 g/cm <sup>3</sup>                                                                                                                   | 2.364 g/cm <sup>3</sup>                                                                                                                   | 2.280 g/cm <sup>3</sup>                                                                                                                      | 2.285 g/cm <sup>3</sup>                                                                                                                      | 5.734 g/cm <sup>3</sup>                                                                                                                   |
| Rb/Pb precursor      | Undoped                                                                                                                                   | 5:100                                                                                                                                     | Undoped                                                                                                                                      | 5:100                                                                                                                                        | Undoped                                                                                                                                   |
| XPS Rb/Pb (%)        | -                                                                                                                                         | 2.7%                                                                                                                                      | -                                                                                                                                            | 4.6%                                                                                                                                         | -                                                                                                                                         |
| ICPMS Rb/Pb* (%)     | 0.5/14,000 ( $\ll 0.1\%$ )                                                                                                                | 435:13,700 (3.2%)                                                                                                                         | 0.1/13,800 ( $\ll 0.1\%$ )                                                                                                                   | 121:3,150 (3.8%)                                                                                                                             | -                                                                                                                                         |

\*Inductively coupled plasma mass spectrometry Rb/Pb ratio with concentrations in parts per billion (ppb)

## Absorption Curve fitting

The fit was performed by using Elliot formalism.<sup>8</sup> In principle, the contributions to the absorption coefficient ( $\alpha$ ) can be defined from free carriers (continuum) ( $\alpha_c$ ) and excitons ( $\alpha_{ex}$ ).

$$\alpha(\hbar\omega) = \alpha_c + \alpha_{ex} \quad (\text{S1})$$

$$\alpha(\hbar\omega) = P_{cv} \left[ \theta(\hbar\omega - E_g) \cdot \left( \frac{\pi e^{\pi x}}{\sinh(\pi x)} \right) + R_{ex} \sum_{n=1}^{\infty} \frac{4\pi}{n^3} \cdot \delta(\hbar\omega - E_g + \frac{R_{ex}}{n^2}) \right] \quad (\text{S2})$$

Where the frequency dependence of  $P_{cv}$  is approximated as a constant and related to the interband transition matrix element,  $\hbar\omega$  is the photon energy,  $\theta(\hbar\omega - E_g)$  is the Heaviside step function,  $x$  is defined as  $\sqrt{R_{ex}/(\hbar\omega - E_g)}$ , and  $\delta$  denotes a delta function.  $R_{ex}$  is exciton Rydberg energy;  $n$  is the principle quantum number. The fits to the absorption curves are shown in Supplementary Fig. S5.

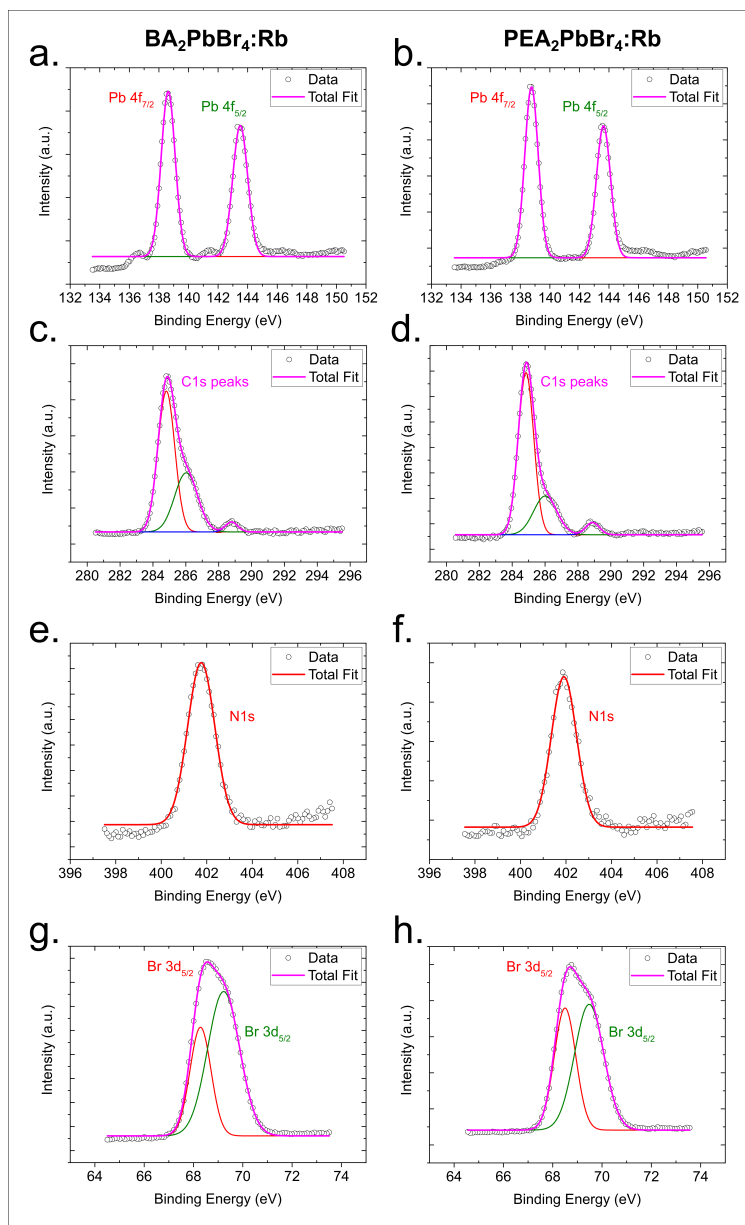

**Supplementary Figure S 3:** X-ray photo-electron spectroscopy data for the Rb-doped 2D-perovskites: Pb-peaks for a) Rb-BA<sub>2</sub>PbBr<sub>4</sub> and b) Rb-PEA<sub>2</sub>PbBr<sub>4</sub>; C-peaks for c) Rb-BA<sub>2</sub>PbBr<sub>4</sub> and d) Rb-PEA<sub>2</sub>PbBr<sub>4</sub>; N-peaks for e) Rb-BA<sub>2</sub>PbBr<sub>4</sub> and f) Rb-PEA<sub>2</sub>PbBr<sub>4</sub>, and Br-peaks for g) Rb-BA<sub>2</sub>PbBr<sub>4</sub> and h) Rb-PEA<sub>2</sub>PbBr<sub>4</sub>.

## Time-resolved PL fitting

PL decay curves were fitted with three exponential decay model and the parameters are shown in Supplementary Table 2.

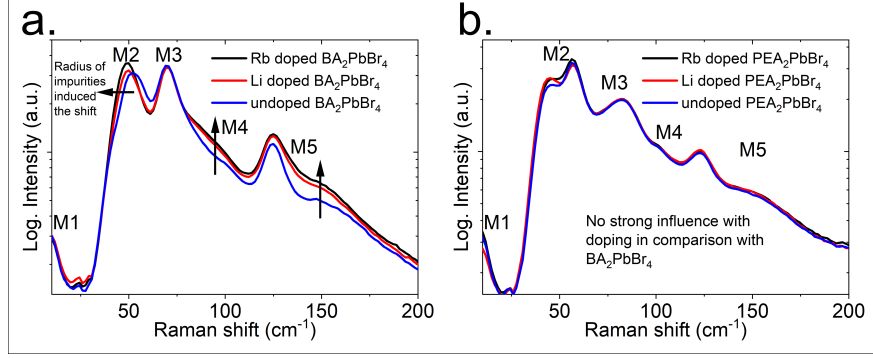

**Supplementary Figure S 4:** Raman spectra and their vibrational modes similar as reported in<sup>3</sup> for undoped, Li doped, and Rb doped, a)  $\text{BA}_2\text{PbBr}_4$  and b)  $\text{PEA}_2\text{PbBr}_4$ . The weak influence of doping to the Raman spectra for  $\text{PEA}_2\text{PbBr}_4$  can be related with the structure itself or unexpected small concentration.

**Supplementary Table S 2:** Parameters of the PL decay curves, where  $\tau_i$  is the decay time,  $C_i$  is the contribution of the decay time and  $\bar{\tau}$  is the mean time of the decay.

| Compound                        | $\tau_1$ (ns) | $C_1$ (%) | $\tau_2$ (ns)  | $C_2$ (%) | $\tau_3$ (ns)    | $C_3$ (%) | $\bar{\tau}$ (ns) |
|---------------------------------|---------------|-----------|----------------|-----------|------------------|-----------|-------------------|
| $\text{BA}_2\text{PbBr}_4$      | $5.2 \pm 0.1$ | 46        | $34.6 \pm 0.3$ | 33        | $289.7 \pm 8.6$  | 21        | $74.6 \pm 1.1$    |
| Rb- $\text{BA}_2\text{PbBr}_4$  | $4.7 \pm 0.1$ | 49        | $25.4 \pm 0.9$ | 35        | $250.2 \pm 3.9$  | 16        | $51.2 \pm 0.9$    |
| $\text{PEA}_2\text{PbBr}_4$     | $7.8 \pm 0.1$ | 68        | $32.1 \pm 0.2$ | 24        | $539.7 \pm 15.7$ | 8         | $56.2 \pm 1.4$    |
| Rb- $\text{PEA}_2\text{PbBr}_4$ | $7.4 \pm 0.1$ | 69        | $28.9 \pm 0.2$ | 24        | $423.6 \pm 12.3$ | 7         | $41.7 \pm 1.5$    |

## The shift of PL and RL spectra after Rb doping

PL and RL spectra of undoped and Rb-doped  $\text{BA}_2\text{PbBr}_4$  and  $\text{PEA}_2\text{PbBr}_4$  crystals are shown in Supplementary Fig. 6. The shift to red is more significant for Rb-doped  $\text{PEA}_2\text{PbBr}_4$  crystals. This is because the strong self absorption due to the small Stokes shift of Rb-doped  $\text{PEA}_2\text{PbBr}_4$  of 0.11 eV. For Rb-doped  $\text{BA}_2\text{PbBr}_4$ , the Stokes shift is still about 0.20 eV.

## Temperature-dependent RL fitting

The fit was carried out according to the model proposed by Shibata et al.:<sup>9</sup>

$$\frac{I(T)}{I(0)} = \frac{1 + D \cdot e^{-E/k_B T}}{1 + C \cdot e^{-E_1/k_B T}} \quad (\text{S3})$$

where  $D$  is the negative thermal quenching coefficient which describes the contribution from thermally excited electrons,  $C$  is the thermal quenching coefficients related to non-radiative

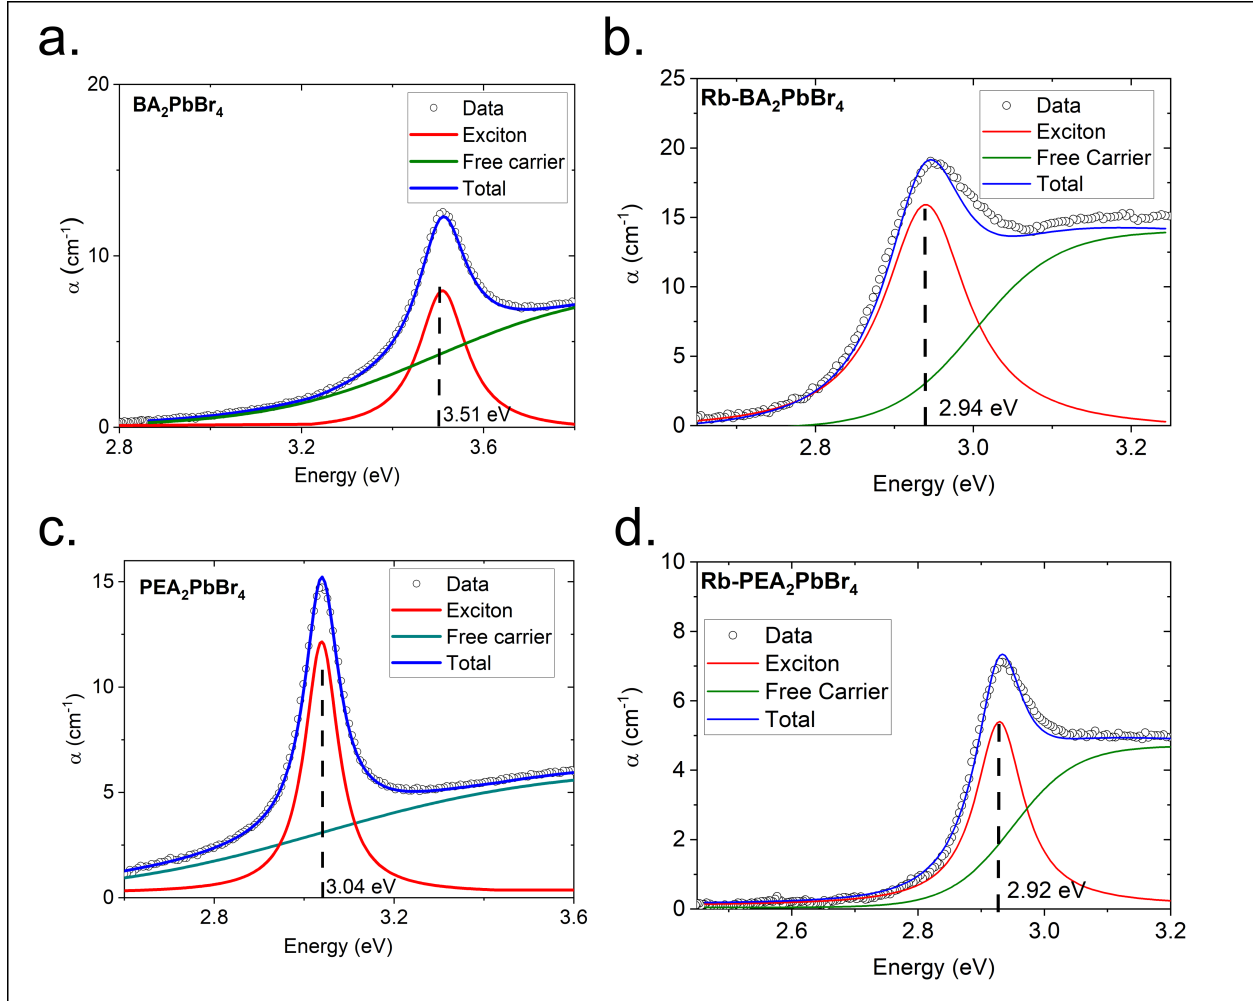

**Supplementary Figure S 5:** Absorption spectra from a) undoped and b) Rb-doped  $\text{BA}_2\text{PbBr}_4$  and c) undoped and d) Rb-doped  $\text{PEA}_2\text{PbBr}_4$  and their fitting curves with Elliot method in Supplementary Eqs. S1 and S2.<sup>4</sup>

electrons excitation leading to thermal quenching,  $E$  is the activation energy for negative thermal quenching and  $E_1$  is the activation energies for typical thermal quenching, respectively and  $k_B$  is the Boltzmann constant. The parameters are shown in Supplementary Table 3.

**Supplementary Table S 3:** Parameters for the negative thermal quenching fitting.

| Compound                       | $C$ (-)            | $E_1$ (meV) | $D$ (-)            | $E$ (meV) |
|--------------------------------|--------------------|-------------|--------------------|-----------|
| $\text{BA}_2\text{PbBr}_4$     | $5.98 \times 10^4$ | 277         | $1.91 \times 10^3$ | 144       |
| $\text{Rb-BA}_2\text{PbBr}_4$  | $7.91 \times 10^5$ | 322         | $5.56 \times 10^4$ | 209       |
| $\text{PEA}_2\text{PbBr}_4$    | $1.31 \times 10^7$ | 438         | $3.27 \times 10^5$ | 304       |
| $\text{Rb-PEA}_2\text{PbBr}_4$ | $6.19 \times 10^5$ | 411         | 342                | 141       |

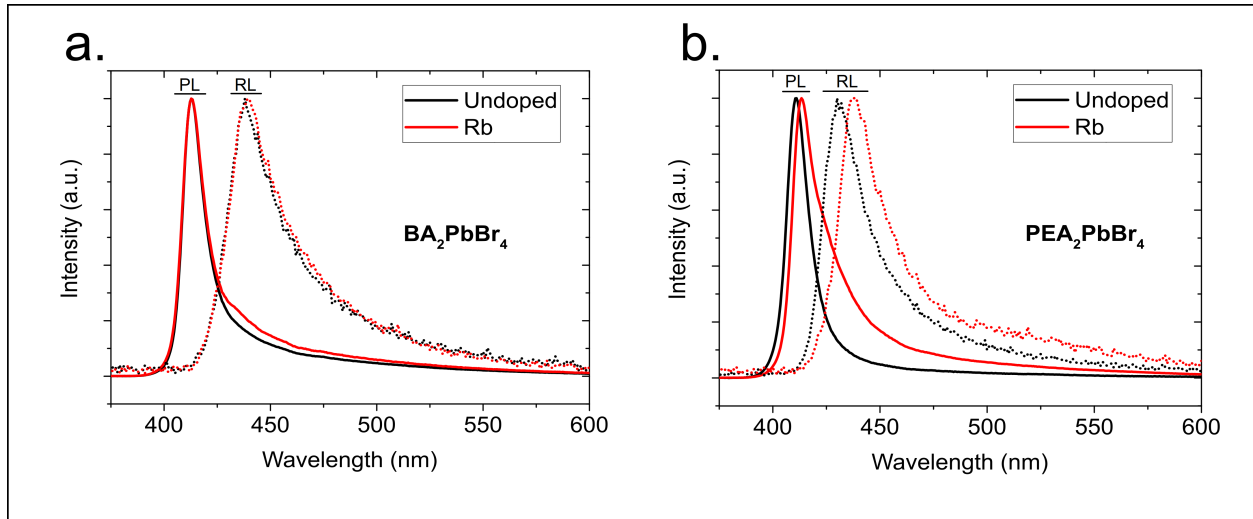

**Supplementary Figure S 6:** PL (solid lines) and RL (dotted lines) spectra for a) undoped (black) and Rb doped (red)  $\text{BA}_2\text{PbBr}_4$  and c) undoped (black) and d) Rb-doped (red)  $\text{PEA}_2\text{PbBr}_4$ .

## Afterglow fitting

The afterglow curves in Figure 4a were fitted with two exponential decay model. The parameters are shown in Supplementary Table 4

**Supplementary Table S 4:** Parameters of the afterglow curves, where  $\tau_i$  is the decay time,  $C_i$  is the contribution of the decay time and  $\bar{\tau}$  is the mean time of the decay.

| Compound                        | $\tau_1$ (s) | $C_1$ (%) | $\tau_2$ (s) | $C_2$ (%) | $\bar{\tau}$ (s) |
|---------------------------------|--------------|-----------|--------------|-----------|------------------|
| $\text{BA}_2\text{PbBr}_4$      | 5.6          | 100       | 0            | 0         | 5.6              |
| Rb- $\text{BA}_2\text{PbBr}_4$  | 10.3         | 83        | 82.2         | 17        | 22.3             |
| $\text{PEA}_2\text{PbBr}_4$     | 0.9          | 100       | 0            | 0         | 0.9              |
| Rb- $\text{PEA}_2\text{PbBr}_4$ | 2.4          | 95        | 52.7         | 5         | 5.1              |

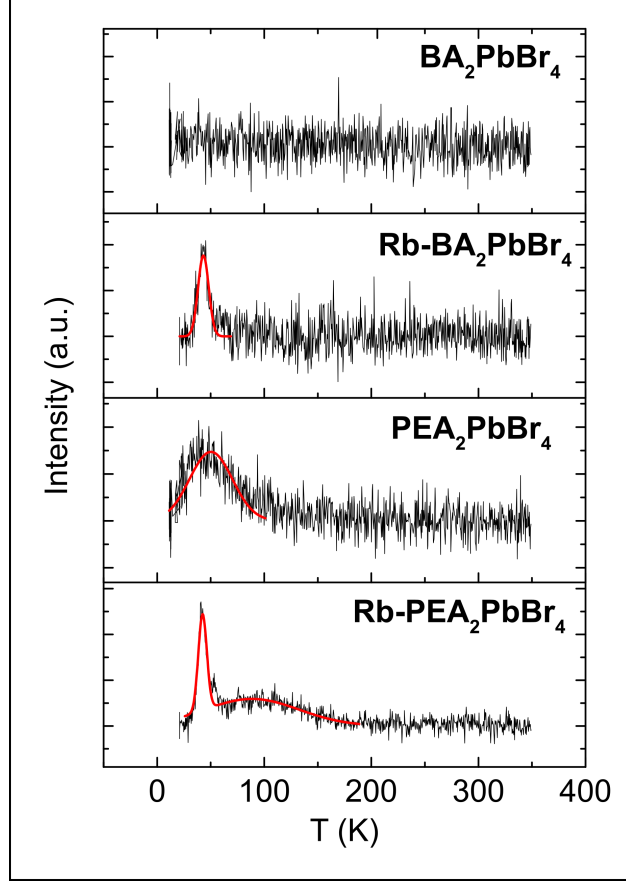

**Supplementary Figure S 7:** The fit of glow curves of undoped and Rb-doped  $\text{BA}_2\text{PbBr}_4$  and  $\text{PEA}_2\text{PbBr}_4$  with multiple Randal-Wilkins method in Supplementary Eq. S4.<sup>5,6</sup> The parameters of the fit are shown in Supplementary Table S5.

## Glow curve fitting

For the quantitative analysis, we deconvolute the glow curves into  $k$  glow peaks, based on the classic Randall-Wilkins equation:<sup>5,6</sup>

$$I_{TL} = \sum_{i=1}^k n_{0_i} V \sigma_i \exp\left(-\frac{E_i}{k_B T}\right) \exp\left(-\frac{\sigma_i}{\beta} \int_{T_0}^T \exp\left(-\frac{E_i}{k_B T'}\right) dT'\right) \quad (\text{S4})$$

where  $T$  is the temperature,  $\beta$  is the heating rate,  $k_B$  is the Boltzmann constant,  $n_{0_i}$  is the initial trap concentration,  $V$  is the crystal volume,  $E_i$  is the trap depth, and  $\sigma_i$  is the frequency factor of each component. The unit-less  $n_{0_i} V$  or  $A_i$  is used to compare afterglow of different crystals. From the fits of Supplementary Eq. S4 to Supplementary Fig. 7, we obtain parameters

as shown in Supplementary Table 5.

**Supplementary Table S 5:** Parameters of the thermoluminescence (TL) peak fitting, where  $T_{max}$  is temperature where the maximum of the peak occurs,  $E$  is the trap depth,  $n_0$  is the trap concentration and  $\sigma$  is the frequency factor.

| Compound                              | $T_{max}$ (K) | $E$ (meV) | $n_0$ (a.u.)      | $\sigma$ ( $s^{-1}$ ) |
|---------------------------------------|---------------|-----------|-------------------|-----------------------|
| BA <sub>2</sub> PbBr <sub>4</sub>     | No trap       |           |                   |                       |
| Rb-BA <sub>2</sub> PbBr <sub>4</sub>  | 43            | 14        | $7.2 \times 10^3$ | $3.9 \times 10^3$     |
| PEA <sub>2</sub> PbBr <sub>4</sub>    | 50            | 10        | $6.0 \times 10^3$ | $3.9 \times 10^3$     |
| Rb-PEA <sub>2</sub> PbBr <sub>4</sub> | 42            | 13        | $5.0 \times 10^4$ | $2.0 \times 10^4$     |
|                                       | 88            | 39        | $5.1 \times 10^3$ | $5.7 \times 10^3$     |

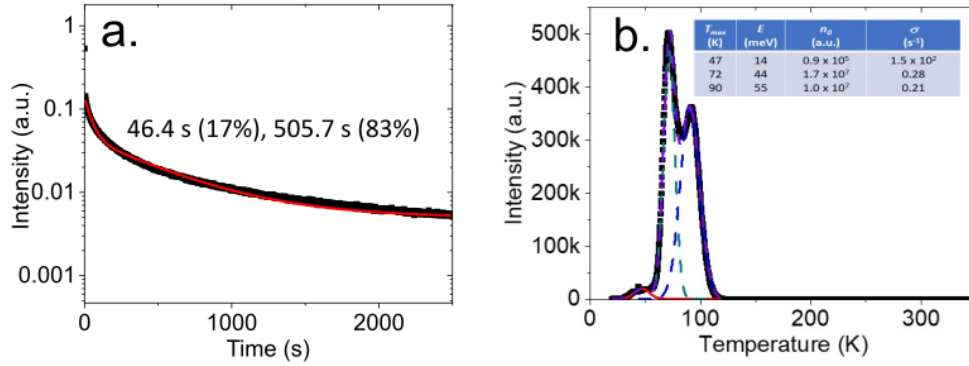

**Supplementary Figure S 8:** RbPb<sub>2</sub>Br<sub>5</sub> crystals as comparisons. a) Afterglow curve and b) TL peaks with the parameters are on the inset table.

## Scintillation decay fitting

Scintillation decay curves in Supplementary Fig. 9 were fitted with three exponential decay model and the parameters are shown in Supplementary Table 6



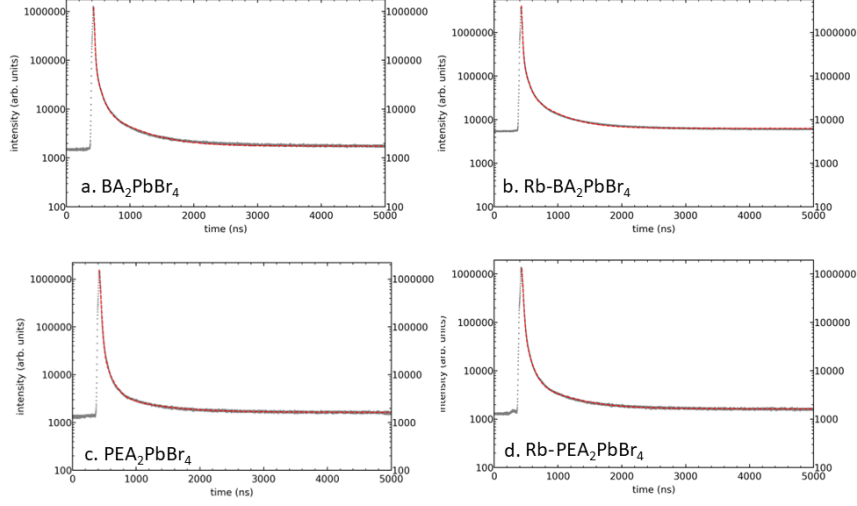

**Supplementary Figure S 9:**  $\gamma$ -ray excited scintillation decay curves at 661.7 keV ( $^{137}\text{Cs}$ ) and room temperature for a) undoped and b) Rb-doped  $\text{BA}_2\text{PbBr}_4$  and c) undoped and d) Rb-doped  $\text{PEA}_2\text{PbBr}_4$  and their fitting curves with three exponential decay model.

**Supplementary Table S 6:** Parameters of the scintillation decay curves, where  $\tau_i$  is the decay time,  $C_i$  is the contribution of the decay time and  $\bar{\tau}$  is the mean time of the decay.

| Compound                        | $\tau_1$ (ns)  | $C_1$ (%) | $\tau_2$ (ns)  | $C_2$ (%) | $\tau_3$ (ns)    | $C_3$ (%) | $\bar{\tau}$ (ns) |
|---------------------------------|----------------|-----------|----------------|-----------|------------------|-----------|-------------------|
| $\text{BA}_2\text{PbBr}_4$      | $4.7 \pm 0.1$  | 72.6      | $70.7 \pm 0.2$ | 16.4      | $476.1 \pm 4.0$  | 11.0      | $67.4 \pm 1.2$    |
| Rb- $\text{BA}_2\text{PbBr}_4$  | $4.4 \pm 0.1$  | 73.6      | $59.6 \pm 0.2$ | 15.6      | $371.4 \pm 3.3$  | 10.8      | $52.6 \pm 1.1$    |
| $\text{PEA}_2\text{PbBr}_4$     | $13.4 \pm 0.1$ | 85.4      | $98.2 \pm 1.3$ | 10.1      | $632.9 \pm 10.2$ | 4.5       | $49.8 \pm 8.9$    |
| Rb- $\text{PEA}_2\text{PbBr}_4$ | $12.3 \pm 0.1$ | 81.5      | $74.6 \pm 1.4$ | 13.3      | $493.4 \pm 24.7$ | 5.2       | $45.6 \pm 4.5$    |

## Pulse height spectra

Here we attached additional pulse height spectra (PHS) measured with 661.7 keV gamma-ray sources as shown in Supplementary Fig. 10. Derived from those spectra, the improvements of the light yields due to the Rb doping are 1.62 and 1.22 folds for  $\text{BA}_2\text{PbBr}_4$  and  $\text{PEA}_2\text{PbBr}_4$ , respectively.

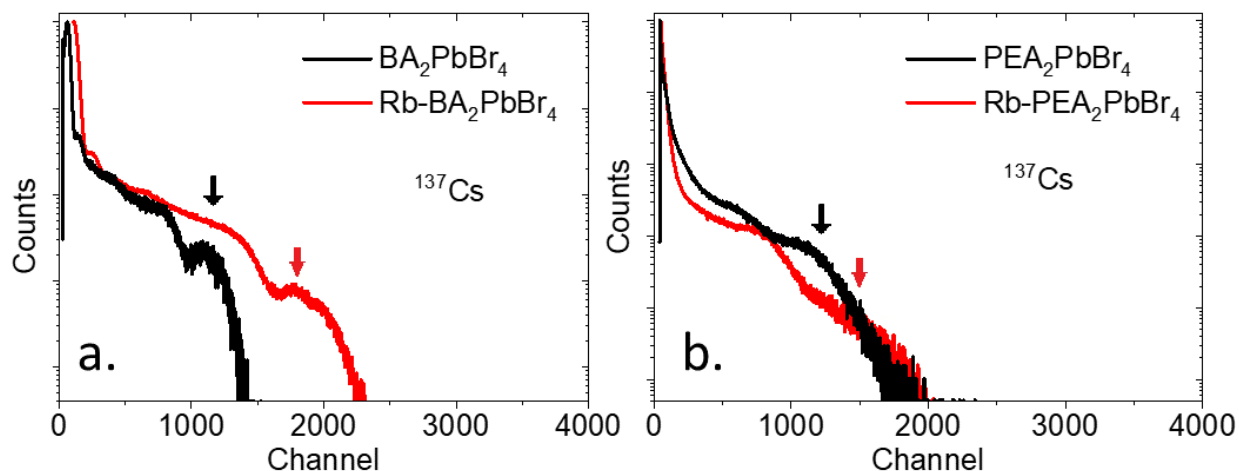

**Supplementary Figure S 10:** Pulse height spectra with a 661.7 keV gamma-ray sources for undoped and Rb-doped  $\text{BA}_2\text{PbBr}_4$  and  $\text{PEA}_2\text{PbBr}_4$ . The arrows indicate the position of the photopeaks and the positions of the undoped peaks were normalized to each other for showing the differences with the doped ones.

## References

- (1) Maddalena, F.; Xie, A.; Arramel; Witkowski, M. E.; Makowski, M.; Mahler, B.; Drozdowski, W.; Mariyappan, T.; Springham, S. V.; Coquet, P.; Dujardin, C.; Birowosuto, M. D.; Dang, C. *J. Mater. Chem. C* **2021**, *9*, 2504–2512.
- (2) Abia, C.; López, C. A.; Gainza, J.; Rodrigues, J. E. F. S.; Ferrer, M. M.; Nemes, N. M.; Dura, O. J.; Martínez, J. L.; Fernández-Díaz, M. T.; Álvarez Galván, C.; Németh, G.; Kamarás, K.; Fauth, F.; Alonso, J. A. *J. Mater. Chem. C* **2022**, *10*, 6857–6865.
- (3) Dhanabalan, B.; Leng, Y.-C.; Biffi, G.; Lin, M.-L.; Tan, P.-H.; Infante, I.; Manna, L.; Arciniegas, M. P.; Krahn, R. *ACS Nano* **2020**, *14*, 4689–4697.
- (4) Diguna, L. J.; Jonathan, L.; Mahyuddin, M. H.; Arramel; Maddalena, F.; Mulyani, I.; Onggo, D.; Bachiri, A.; Witkowski, M. E.; Makowski, M.; Kowal, D.; Drozdowski, W.; Birowosuto, M. D. *Mater. Adv.* **2022**, *3*, 5087–5095.
- (5) Birowosuto, M. D.; Cortecchia, D.; Drozdowski, W.; Brylew, K.; Lachmanski, W.; Bruno, A.; Soci, C. *Sci. Rep.* **2016**, *6*, 37254.

- (6) Randall, J. T.; Wilkins, M. H. F. *Proc. R. Soc. Lond. A* **1945**, *184*, 365–389.
- (7) Rodríguez-Carvajal, J. *Phys. B: Condens. Matter* **1993**, *192*, 55–69.
- (8) Elliott, R. J. *Phys. Rev.* **1957**, *108*, 1384–1389.
- (9) Shibata, H. *Jpn. J. Appl. Phys.* **1998**, *37*, 550–553.
